# Supplementary material
Source: MDPI journal article supplement (https://www.mdpi.com/1424-2818/11/4/56)
Supplement: s1 [file s1]

## Supplementary Materials

**Table S1.** List of taxa found in abundance and attachment surveys.

| Taxa                                  | Abb.   | Type       | PA | MS | Dur | Und | Cys | Net |
|---------------------------------------|--------|------------|----|----|-----|-----|-----|-----|
| <i>Acanthochiton zelandica</i>        | Aca    | Chiton     | A  | M  | x   | 0   | 0   | x   |
| <i>Actinothoe sp.</i>                 | Act    | Anemone    | A  | S  | x   | x   | x   | 0   |
| <i>Adenocystis utricularis</i>        | Ade    | Brown alga | P  | S  | x   | 0   | 0   | 0   |
| <i>Anemone orange</i>                 | Ane o  | Anemone    | A  | S  | x   | 0   | 0   | 0   |
| <i>Anemone white</i>                  | Ane w  | Anemone    | A  | S  | x   | 0   | 0   | 0   |
| <i>Anotrichium crinitum</i>           | Ano    | Red alga   | P  | S  | x   | x   | x   | x   |
| <i>Anthopleura sp.</i>                | Ant    | Anemone    | A  | S  | x   | x   | 0   | 0   |
| <i>Aulacomya maoriana</i>             | Aul    | Mussel     | A  | M  | x   | 0   | 0   | x   |
| <i>Ballia callitrica</i>              | Bal c  | Red alga   | P  | S  | x   | 0   | 0   | x   |
| <i>Ballia hirsuta</i>                 | Bal sp | Red alga   | P  | S  | x   | x   | 0   | x   |
| <i>Bryozoa brown</i>                  | Bry b  | Bryozoa    | A  | S  | 0   | x   | 0   | 0   |
| <i>Bryozoa yellow</i>                 | Bry y  | Bryozoa    | A  | S  | 0   | 0   | x   | 0   |
| <i>Callophyllis callibletharoides</i> | Cal    | Red alga   | P  | S  | x   | x   | 0   | x   |
| <i>Cantharidella tessellata</i>       | Can    | Gastropod  | A  | M  | x   | x   | x   | x   |
| <i>Cellana radians</i>                | Cel    | Limpet     | A  | M  | x   | 0   | 0   | x   |
| <i>Ceramium spp.</i>                  | Cer    | Red alga   | P  | S  | x   | 0   | x   | x   |
| <i>Chaetomorpha coliformis</i>        | Cha    | Green alga | P  | S  | x   | x   | 0   | x   |
| <i>Chondria macrocarpa</i>            | Cho    | Red alga   | P  | S  | x   | 0   | x   | x   |
| <i>Codium dimorphum</i>               | Cod    | Green alga | P  | S  | x   | 0   | 0   | x   |
| <i>Cookia sulcata</i>                 | Coo    | Gastropod  | A  | M  | x   | x   | x   | x   |
| Corallinales 'encrusting'             | Cor e  | Red alga   | P  | S  | x   | x   | x   | x   |
| Corallinales 'turf'                   | Cor t  | Red alga   | P  | S  | x   | x   | x   | x   |
| <i>Cricophorus nutrix</i>             | Cri    | Anemone    | A  | S  | 0   | 0   | x   | x   |
| <i>Cystophora retroflexa</i>          | Cys r  | Brown alga | P  | S  | x   | x   | x   | x   |
| <i>Cystophora scalaris</i>            | Cys s  | Brown alga | P  | S  | x   | x   | x   | x   |
| <i>Cystophora torulosa</i>            | Cys t  | Brown alga | P  | S  | x   | x   | x   | x   |
| <i>Dasyclonium sp.</i>                | Das    | Red alga   | P  | S  | 0   | x   | x   | 0   |
| <i>Dictyota sp.</i>                   | Dic    | Brown alga | P  | S  | x   | x   | 0   | 0   |
| <i>Dipterosiphonia heteroclada</i>    | Dip    | Red alga   | P  | S  | x   | x   | 0   | x   |
| <i>Durvillaea poha</i>                | Dur    | Brown alga | P  | S  | x   | 0   | x   | 0   |
| <i>Durvillaea willana</i>             | Dur w  | Brown alga | P  | S  | x   | 0   | 0   | 0   |
| <i>Echinothamnion hystrix</i>         | Ech h  | Red alga   | P  | S  | 0   | 0   | 0   | x   |
| <i>Echinothamnion sp.</i>             | Ech sp | Red alga   | P  | S  | x   | x   | x   | x   |
| <i>Ectocarpus spp.</i>                | Ect    | Brown alga | P  | S  | x   | 0   | 0   | 0   |
| <i>Eudoxochiton nobilis</i>           | Eud    | Chiton     | A  | M  | x   | 0   | 0   | x   |
| <i>Euptilota formosissima</i>         | Eup    | Red alga   | P  | S  | x   | 0   | 0   | 0   |
| <i>Gelidium caulacanthum</i>          | Gel p  | Red alga   | P  | S  | 0   | 0   | 0   | x   |
| <i>Gelidium microphyllum</i>          | Gel m  | Red alga   | P  | S  | x   | x   | 0   | x   |
| <i>Gigartina livida</i>               | Gig    | Red alga   | P  | S  | 0   | 0   | x   | 0   |
| <i>Halicarcinus spp.</i>              | Hal    | Crab       | A  | M  | 0   | 0   | 0   | x   |
| <i>Haliotis australis</i>             | Hal a  | Gastropod  | A  | M  | x   | 0   | 0   | x   |
| <i>Halopteris congesta</i>            | Hal sp | Brown alga | P  | S  | x   | x   | x   | x   |
| <i>Helminthocladia sp.</i>            | Hel sp | Red alga   | P  | S  | 0   | 0   | x   | 0   |
| <i>Heterosiphonia sp.</i>             | Het    | Red alga   | P  | S  | 0   | x   | x   | x   |
| <i>Hildenbrandia sp.</i>              | Hil    | Red alga   | P  | S  | x   | x   | 0   | 0   |

|                                     |        |            |   |   |   |   |   |   |
|-------------------------------------|--------|------------|---|---|---|---|---|---|
| <i>Hydrozoa sp.</i>                 | Hyd    | Hydroid    | A | S | 0 | x | 0 | x |
| <i>Hymenena sp.</i>                 | Hym    | Red alga   | P | S | x | x | x | x |
| <i>Isactinia olivacea.</i>          | Isa    | Anemone    | A | S | x | 0 | x | 0 |
| <i>Jania sphaeroramosa</i>          | Jan    | Red alga   | P | S | x | x | x | x |
| <i>Leathesia difformis</i>          | Col    | Brown alga | P | S | 0 | x | 0 | x |
| <i>Lophothamnion hirtum</i>         | Lop h  | Red alga   | P | S | x | x | x | x |
| <i>Lophurella caespitosa</i>        | Lop c  | Red alga   | P | S | x | x | x | 0 |
| <i>Lophurella sp</i>                | Lop sp | Red alga   | P | S | x | 0 | 0 | x |
| <i>Lunella smaragda</i>             | Lun    | Gastropod  | A | M | x | x | x | x |
| <i>Membranipora sp.</i>             | Mem    | Bryozoa    | A | S | 0 | 0 | 0 | x |
| <i>Micrelenchus spp.</i>            | Mic    | Gastropod  | A | M | 0 | 0 | 0 | x |
| <i>Microcladia novae-zelandiae</i>  | Mic n  | Red alga   | P | S | 0 | 0 | 0 | x |
| <i>Microzonia velutina</i>          | Zon    | Brown alga | P | S | x | x | x | x |
| <i>Modiolus areolatus</i>           | Mod    | Mussel     | A | M | x | 0 | 0 | x |
| <i>Notoacmea spp.</i>               | Not    | Limpet     | A | M | x | x | 0 | x |
| <i>Onithochiton neglectus</i>       | Oni    | Chiton     | A | M | x | 0 | x | 0 |
| <i>Oulactis mucosa</i>              | Oul    | Anemone    | A | S | x | x | 0 | 0 |
| <i>Perna canaliculus</i>            | Per    | Mussel     | A | M | x | 0 | 0 | x |
| <i>Plocamium microcladioides</i>    | Plo    | Red alga   | P | S | 0 | 0 | x | 0 |
| <i>Polysiphonia decipiens</i>       | Pol    | Red alga   | P | S | 0 | 0 | x | x |
| <i>Polysiphonia strictissima</i>    | Pol s  | Red alga   | P | S | x | 0 | x | 0 |
| <i>Pomatoceros sp.</i>              | Pom    | Polychaete | A | S | x | x | x | 0 |
| <i>Ralfsia sp.</i>                  | Ral    | Brown alga | P | S | x | x | x | x |
| <i>Red blade</i>                    | Red b  | Red alga   | P | S | x | x | x | x |
| <i>Red blade prostrate</i>          | Red bp | Red alga   | P | S | x | 0 | 0 | 0 |
| <i>Red filament</i>                 | Red f  | Red alga   | P | S | 0 | 0 | 0 | x |
| <i>Schizoseris dichotoma</i>        | Sch    | Red alga   | P | S | 0 | 0 | 0 | x |
| <i>Shell (dead bivalvia)</i>        | She    | Mussel     | A | M | 0 | 0 | 0 | x |
| <i>Siphonaria sp.</i>               | Sip    | Limpet     | A | M | x | x | x | x |
| <i>Spiky Red</i>                    | Spi r  | Red alga   | P | S | x | x | 0 | 0 |
| <i>Spirobis sp.</i>                 | Spi    | Polychaete | A | S | 0 | x | 0 | x |
| <i>Sponge (orange)</i>              | Spo o  | Sponge     | A | S | x | 0 | 0 | 0 |
| <i>Sponge (pink)</i>                | Spo p  | Sponge     | A | S | x | 0 | 0 | 0 |
| <i>Sponge (yellow)</i>              | Spo y  | Sponge     | A | S | x | 0 | 0 | 0 |
| <i>Sypharochiton pelliserpentis</i> | Syp    | Chiton     | A | M | x | 0 | x | x |
| <i>Terebellidae</i>                 | Ter    | Polychaete | A | M | x | 0 | x | 0 |
| <i>Tethya sp.</i>                   | Tet    | Sponge     | A | S | 0 | x | 0 | 0 |
| <i>Ulva sp</i>                      | Ulv    | Green alga | P | S | x | x | x | x |
| <i>Undaria pinnatifida</i>          | Und    | Brown alga | P | S | x | x | x | x |
| <i>Xiphophora gladiata</i>          | Xip    | Brown alga | P | S | x | x | 0 | 0 |

Data were collected from 16 plots dominated by *Durvillaea* spp. (Dur) spp., 7 plots dominated by *Undaria pinnatifida* (Und) and 7 plots dominated by *Cystophora* spp. (Cys). Column coding: Abb. = Abbreviation (as used in the manuscript figures), P = plant, A = animal, M = mobile, S = sessile. Cyst, Dur, Und = taxa recorded in the abundance survey, grouped by three types of habitats. Net = taxa recorded in the attachment survey (pooled across habitats, habitat specific network data is shown in figure 4), x = observed, 0 = not observed.

**Table S2.** Network terminology and measured metrics.

| <b>Network Terminology</b>         | <b>Measured Metrics</b>                                                                                                                                                                                                                                                                                              |
|------------------------------------|----------------------------------------------------------------------------------------------------------------------------------------------------------------------------------------------------------------------------------------------------------------------------------------------------------------------|
| Nodes                              | Species                                                                                                                                                                                                                                                                                                              |
| Links                              | Interaction between two nodes (here attachment of an epibiont on a host)                                                                                                                                                                                                                                             |
| Directional network                | nodes can be connected with directional links (here a linked species pair can theoretically be hosts and epibionts)                                                                                                                                                                                                  |
| Degree of a node                   | Number of links (connections, edges) a node has to other nodes. If a network is directed, meaning that links point in one direction from one node to another, then nodes have two different degrees; the in-degree, which is the number of incoming links, and the out-degree, which is the number of outgoing edges |
| In Degree for a node               | Straightforward measure of centrality. It measures the total number of nodes linking to that node                                                                                                                                                                                                                    |
| Out Degree for a node              | Straightforward measure of centrality. It measures the total number of nodes that that node links to                                                                                                                                                                                                                 |
| Total Degree for a node            | Straightforward measure of centrality. It is the total number of edges that that node has. For directed networks it is the sum of In Degree and Out Degree                                                                                                                                                           |
| Average Neighbor Degree for a node | The average number of edges (i.e., degree) that a node's neighbors have. For directed networks, it is possible to specify whether to use in-degree or out-degree for each of the source and target nodes in the calculation                                                                                          |
| Betweenness Centrality for a node  | The total number of shortest paths that pass through that node and, if the Normalized option is selected, divided by the total number of shortest paths in the network. It is a measure of how much a node is a 'bridge' between other nodes in the network                                                          |
